# Supplementary material for: Future heat waves over the Mediterranean from an Euro-CORDEX regional climate model ensemble
Source: PubMed Central journal article supplement (PMC7260175; doi:10.1038/s41598-020-65663-0), 2020-05-29
Supplement: 41598_2020_65663_MOESM1_ESM.pdf [file 41598_2020_65663_MOESM1_ESM.pdf]

# Future heat waves over the Mediterranean from an Euro-CORDEX regional climate model ensemble

M. O. Molina<sup>1,\*</sup>, E. Sánchez<sup>2</sup> and C. Gutiérrez<sup>1</sup>

<sup>1</sup>University of Castilla-La Mancha (UCLM), Instituto de Ciencias Ambientales, Avenida Carlos III s/n, 45071-Toledo

<sup>2</sup>University of Castilla-La Mancha (UCLM), Faculty of Environmental Sciences and Biochemistry, Avenida Carlos III s/n, 45071-Toledo

\*[MOfelia.Molina@uclm.es](mailto:MOfelia.Molina@uclm.es)

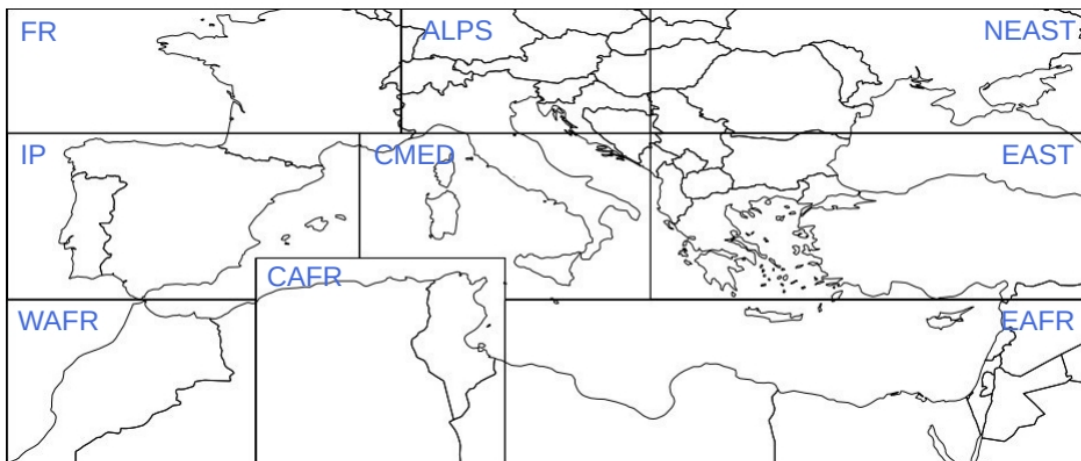

**Fig. S1.** Description of the nine subregions proposed for details subdomain analysis: FR (France), ALPS (Alps), NEAST (North East Mediterranean), IP (Iberian Peninsula), CMED (Central Mediterranean), EAST (East Mediterranean), WAFR (Western African coast), CAFR (Central African coast) and EAFR (Eastern African coast).

**Table S1.** Kendall's rank correlation coefficient, tau, of the HWMI annual regional averages for 2071-2100 at 0.11° resolution and RCP8.5 scenario for each single model and ensemble mean (p-value < 0.05).

| Model           | FR   | ALPS | NEAST | PI   | CMED | EAST | WAFR | CAFR | EAFR |
|-----------------|------|------|-------|------|------|------|------|------|------|
| CNRM-ALADIN     | 0.60 | 0.71 | 0.75  | 0.68 | 0.60 | 0.75 | 0.85 | 0.82 | 0.85 |
| CNRM-CCLM       | 0.72 | 0.70 | 0.58  | 0.85 | 0.73 | 0.73 | 0.86 | 0.76 | 0.86 |
| CNRM-RCA        | 0.56 | 0.60 | 0.69  | 0.81 | 0.64 | 0.71 | 0.86 | 0.84 | 0.85 |
| EC-EARTH-CCLM   | 0.73 | 0.68 | 0.63  | 0.82 | 0.80 | 0.77 | 0.92 | 0.87 | 0.92 |
| EC-EARTH-HIRHAM | 0.75 | 0.70 | 0.69  | 0.79 | 0.72 | 0.80 | 0.97 | 0.84 | 0.90 |
| EC-EARTH-RACMO  | 0.75 | 0.73 | 0.67  | 0.79 | 0.68 | 0.81 | 0.88 | 0.84 | 0.88 |
| EC-EARTH-RCA    | 0.76 | 0.77 | 0.70  | 0.86 | 0.83 | 0.77 | 0.91 | 0.87 | 0.91 |
| IPSL-RCA        | 0.78 | 0.78 | 0.70  | 0.86 | 0.83 | 0.86 | 0.94 | 0.91 | 0.94 |
| IPSL-WRF        | 0.70 | 0.72 | 0.84  | 0.85 | 0.82 | 0.86 | 0.91 | 0.88 | 0.91 |
| MPI-CCLM        | 0.66 | 0.67 | 0.72  | 0.85 | 0.78 | 0.78 | 0.90 | 0.89 | 0.90 |
| MPI-RCA         | 0.68 | 0.78 | 0.74  | 0.84 | 0.81 | 0.84 | 0.91 | 0.88 | 0.91 |
| MPI-REMO        | 0.71 | 0.70 | 0.71  | 0.85 | 0.83 | 0.84 | 0.87 | 0.85 | 0.87 |
| HadGEM-CCLM     | 0.83 | 0.80 | 0.81  | 0.91 | 0.88 | 0.88 | 0.94 | 0.91 | 0.94 |
| HadGEM-HIRHAM   | 0.81 | 0.82 | 0.81  | 0.87 | 0.84 | 0.86 | 0.93 | 0.90 | 0.93 |
| HadGEM-RACMO    | 0.72 | 0.70 | 0.85  | 0.87 | 0.82 | 0.89 | 0.94 | 0.91 | 0.94 |
| HadGEM-RCA      | 0.83 | 0.82 | 0.86  | 0.91 | 0.86 | 0.90 | 0.96 | 0.92 | 0.96 |
| Mean            | 0.87 | 0.90 | 0.90  | 0.95 | 0.92 | 0.93 | 0.97 | 0.96 | 0.97 |

**Table S2.** Kendall's rank correlation coefficient, tau, of the WSDI annual regional averages for 2071-2100 at 0.11° resolution and RCP8.5 scenario for each single model and ensemble mean (p-value < 0.05).

| Model           | FR   | ALPS | NEAST | PI   | CMED | EAST | WAFR | CAFR | EAFR |
|-----------------|------|------|-------|------|------|------|------|------|------|
| CNRM-ALADIN     | 0.77 | 0.83 | 0.81  | 0.78 | 0.81 | 0.88 | 0.87 | 0.87 | 0.90 |
| CNRM-CCLM       | 0.76 | 0.82 | 0.81  | 0.82 | 0.87 | 0.88 | 0.91 | 0.86 | 0.87 |
| CNRM-RCA        | 0.76 | 0.80 | 0.82  | 0.82 | 0.82 | 0.88 | 0.90 | 0.87 | 0.88 |
| EC-EARTH-CCLM   | 0.82 | 0.86 | 0.78  | 0.89 | 0.87 | 0.87 | 0.90 | 0.91 | 0.92 |
| EC-EARTH-HIRHAM | 0.81 | 0.82 | 0.81  | 0.90 | 0.89 | 0.88 | 0.93 | 0.92 | 0.91 |
| EC-EARTH-RACMO  | 0.86 | 0.86 | 0.80  | 0.87 | 0.85 | 0.91 | 0.92 | 0.91 | 0.90 |
| EC-EARTH-RCA    | 0.86 | 0.88 | 0.81  | 0.91 | 0.90 | 0.89 | 0.89 | 0.88 | 0.92 |
| IPSL-RCA        | 0.83 | 0.88 | 0.83  | 0.92 | 0.93 | 0.93 | 0.95 | 0.93 | 0.95 |
| IPSL-WRF        | 0.73 | 0.82 | 0.84  | 0.87 | 0.88 | 0.94 | 0.93 | 0.92 | 0.95 |
| MPI-CCLM        | 0.77 | 0.78 | 0.78  | 0.85 | 0.85 | 0.87 | 0.93 | 0.91 | 0.88 |
| MPI-RCA         | 0.84 | 0.86 | 0.81  | 0.89 | 0.88 | 0.90 | 0.92 | 0.92 | 0.90 |
| MPI-REMO        | 0.81 | 0.82 | 0.80  | 0.87 | 0.85 | 0.90 | 0.91 | 0.90 | 0.91 |
| HadGEM-CCLM     | 0.90 | 0.90 | 0.87  | 0.93 | 0.91 | 0.90 | 0.93 | 0.93 | 0.91 |
| HadGEM-HIRHAM   | 0.88 | 0.86 | 0.84  | 0.91 | 0.87 | 0.89 | 0.94 | 0.92 | 0.91 |
| HadGEM-RACMO    | 0.83 | 0.85 | 0.90  | 0.93 | 0.87 | 0.91 | 0.94 | 0.93 | 0.92 |
| HadGEM-RCA      | 0.90 | 0.87 | 0.87  | 0.93 | 0.92 | 0.91 | 0.93 | 0.92 | 0.91 |
| Mean            | 0.93 | 0.94 | 0.93  | 0.96 | 0.96 | 0.95 | 0.97 | 0.98 | 0.97 |
